# Supplementary material for: CO2adsorption on crab shell derived activated carbons: contribution of micropores and nitrogen-containing groups
Source: Royal Society of Chemistry journal article supplement (doi:10.1039/c5ra04937g), 2015-01-01
Supplement: c5ra04937g1.pdf [file c5ra04937g1.pdf]

Supporting information for:

**CO<sub>2</sub> adsorption on crab shell derived activated carbons:  
contributions of micropores and nitrogen-containing groups**

Tao Chen, Shubo Deng \*, Bin Wang, Jun Huang, Yujue Wang, Gang Yu

School of Environment, Beijing Key Laboratory for Emerging Organic Contaminants  
Control, State Key Joint Laboratory of Environment Simulation and Pollution Control  
(SKLESPC), Tsinghua University, Beijing 100084, China

\* Corresponding author, Tel.: +86-10-62792165. Fax: +86-10-62794006.

E-mail: dengshubo@tsinghua.edu.cn (S. Deng)

**Table S1** Comparison of CO<sub>2</sub> adsorption at 25 °C on different activated carbons

| Precursors                                | N content (%) | CO <sub>2</sub> pressure (bar) | CO <sub>2</sub> uptake (mmol/g) | S(CO <sub>2</sub> /N <sub>2</sub> )  | Ref.       |
|-------------------------------------------|---------------|--------------------------------|---------------------------------|--------------------------------------|------------|
| Olive stones                              | /             | 0.15/1.0                       | 1.02/3.0                        | 15.2 <sup>a</sup>                    | S1         |
| Carbide                                   | /             | 1.0                            | 4.1                             | /                                    | 22         |
| Eucalyptus saw dust                       | /             | 0.15/1.0                       | 1.23/4.8                        | 5.4 <sup>b</sup>                     | S2         |
| Corn cob                                  | 0.01          | 0.15/1.0                       | ~0.56/1.5                       | /                                    | S3         |
| Fungi                                     | /             | 0.15/1.0                       | ~0.9/3.4                        | 18.5 <sup>c</sup>                    | S4         |
| Celtuce leaves                            | /             | 0.15/1.0                       | ~0.93/4.36                      | /                                    | S5         |
| Pine nut shell                            |               | 0.15/1.0                       | 2.0/5.0                         | /                                    | 11         |
| Phenolic resin                            | /             | 0.15/1.0                       | ~1.22/4.37                      | /                                    | 8          |
| Phenolic resin                            | /             | 0.2/1.0                        | 1.42/4.55                       | /                                    | S6         |
| Petroleum pitch                           | /             | 1.0                            | 4.7                             | 2.4 <sup>b</sup>                     | S7         |
| Petroleum pitch-phenolic resin            | /             | 0.15/1.0                       | ~0.73/2.7                       | 15.4 <sup>c</sup>                    | 30         |
| CNTs-phenolic resin                       | /             | 0.15/1.0                       | 1.18/3.45                       | 19.8 <sup>c</sup>                    | S8         |
| Polypyrrole                               | 8.95          | 0.15/1.0                       | 1.4/4.8                         | 26.5 <sup>a</sup>                    | 14         |
| Polyindole                                | 4.17          | 0.15/1.0                       | ~1.63/3.42                      | 58.9 <sup>c</sup> /31.8 <sup>a</sup> | 13         |
| Polyindole-modified Graphene oxide sheets | 4.64          | 0.15/1.0                       | ~1.05/3.0                       | 23 <sup>c</sup> /39.7 <sup>a</sup>   | 17         |
| Polyaniline                               | 6.6           | 0.15/1.0                       | 1.38/4.30                       | 8.42 <sup>b</sup>                    | 27         |
| Polyacrylonitrile                         | 1.8           | 0.15/1.0                       | ~1.25/5.14                      | /                                    | S9         |
| Chitosan                                  | 4.59          | 0.15/1.0                       | ~1.26/3.86                      | 21 <sup>b</sup>                      | S10        |
| Urea formaldehyde resin                   | 13.87         | 0.15/1.0                       | ~0.95/3.26                      | /                                    | S11        |
| Melamine formaldehyde resins              | 31.7          | 1.0                            | 1.03                            | /                                    | 36         |
| Bean dreg                                 | 2.8           | 0.15/1.0                       | 1.34/4.24                       | /                                    | 34         |
| Algae-glucose                             | 1.47          | 0.15/1.0                       | ~1.13/4.5                       | 17.3 <sup>a</sup>                    | S12        |
| Phenolic resin-dicyandiamide              | 6.7           | 0.15/1.0                       | ~1.0/3.2                        | /                                    | 36         |
| Crab shell                                | 6.35          | 0.15/1.0                       | 1.57/4.37                       | 23.1 <sup>a</sup>                    | This study |

$$S(CO_2/N_2) = \frac{q_{CO_2,0.15bar}}{q_{N_2,0.85bar}} \times \frac{0.85}{0.15}$$

<sup>a</sup> Selectivity calculated using IAST method,

<sup>b</sup> Selectivity calculated using single component gas adsorption capacity at 1 bar,

$$S(CO_2/N_2) = \frac{q_{CO_2,1.0bar}}{q_{N_2,1.0bar}}$$

<sup>c</sup> Selectivity calculated using the ratios of the Henry's law constants, which is estimated from the initial slopes of CO<sub>2</sub> ( $I_{CO_2}$ ) and N<sub>2</sub> ( $I_{N_2}$ ) adsorption isotherms,  $S(CO_2/N_2) = I_{CO_2}/I_{N_2}$ .

## References

- S1 A. S. González, M. G. Plaza, F. Rubiera and C. Pevida, *Chem. Eng. J.*, 2013, **230**, 456-465.
- S2 M. Sevilla and A. B. Fuertes, *Energy Environ. Sci.*, 2011, **4**, 1765-1771.
- S3 M. Song, B. Jin, R. Xiao, L. Yang, Y. Wu, Z. Zhong and Y. Huang, *Biomass Bioenerg.*, 2013, **48**, 250-256.
- S4 J. Wang, A. Heerwig, M. R. Lohe, M. Oschatz, L. Borchardt and S. Kaskel, *J. Mater. Chem.*, 2012, **22**, 13911-13913.
- S5 R. Wang, P. Wang, X. Yan, J. Lang, C. Peng and Q. Xue, *ACS Appl. Mater. Interfaces*, 2012, **4**, 5800-5806.
- S6 N. P. Wickramaratne and M. Jaroniec, *ACS Appl. Mater. Interfaces*, 2013, **5**, 1849-1855.
- S7 A. Wahby, J. M. Ramos-Fernandez, M. Martinez-Escandell, A. Sepulveda-Escribano, J. Silvestre-Albero and F. Rodriguez-Reinoso, *ChemSusChem*, 2010, **3**, 974-981.
- S8 Y. Jin, S. C. Hawkins, C. P. Huynh and S. Su, *Energy Environ. Sci.*, 2013, **6**, 2591-2596.
- S9 M. Nandi, K. Okada, A. Dutta, A. Bhaumik, J. Maruyama, D. Derks and H. Uyama, *Chem. Commun.*, 2012, **48**, 10283-10285.
- S10 X. Fan, L. Zhang, G. Zhang, Z. Shu and J. Shi, *Carbon*, 2013, **61**, 423-430.
- S11 Z. Liu, Du Z, H. Song, C. Wang, F. Subhan, W. Xing and Z. Yan, *J. Colloid Interf. Sci.*, 2014, **416**, 124-132.
- S12 M. Sevilla, C. Falco, M. Titirici and A. B. Fuertes, *RSC Adv.*, 2012, **2**, 12792-12797.

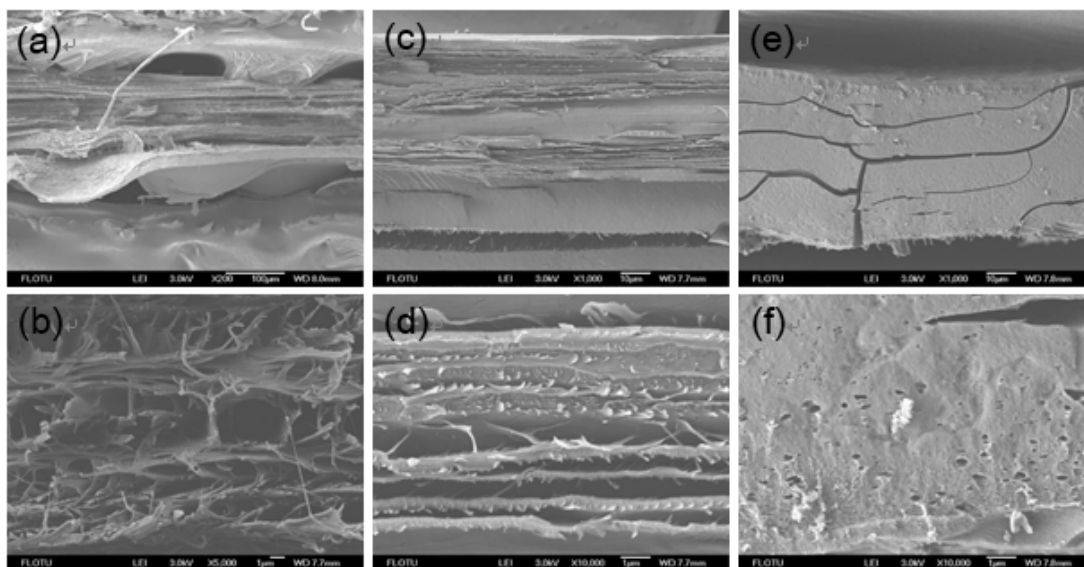

**Fig. S1** SEM images of pristine crab shell (after acid treatment and drying, a and b), carbonized sample (c and d) and KOH activated sample (CS-650-1.5, e and f)

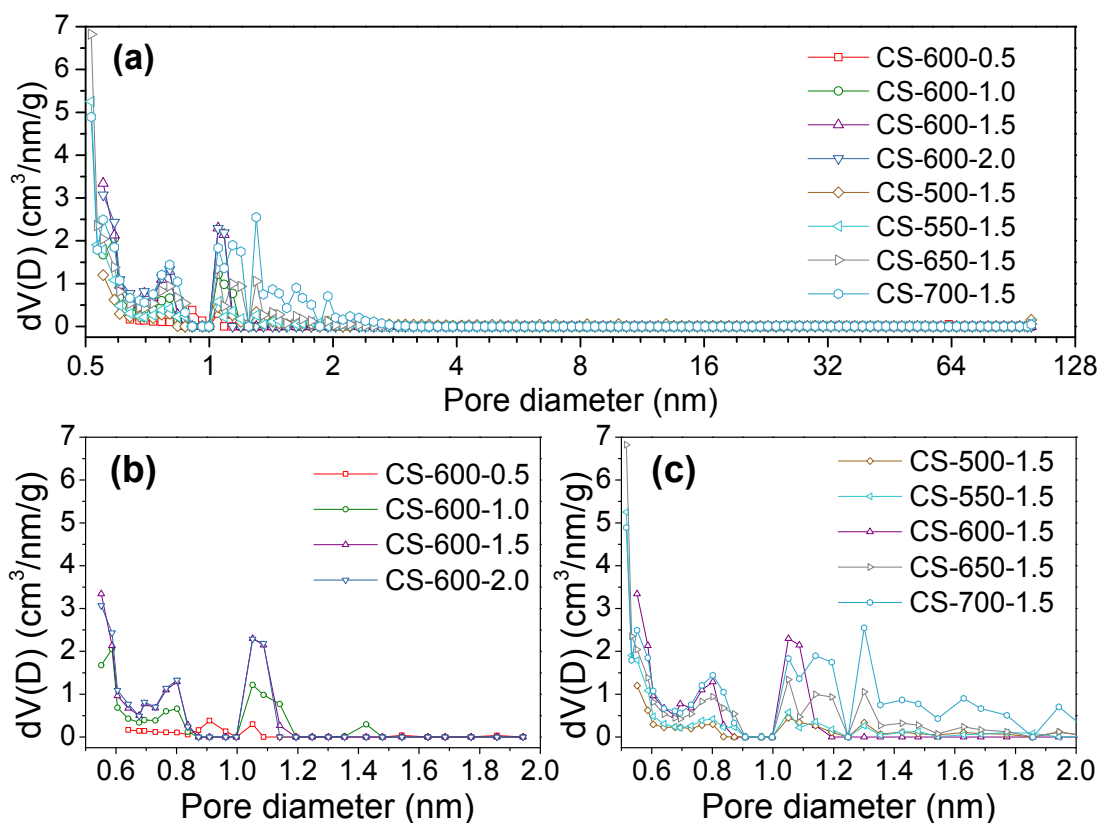

**Fig. S2** Pore size distribution of crab shell derived activated carbons prepared at different KOH/C ratios and activation temperatures at pore sizes below 100 nm (a), and below 2 nm (b and c)

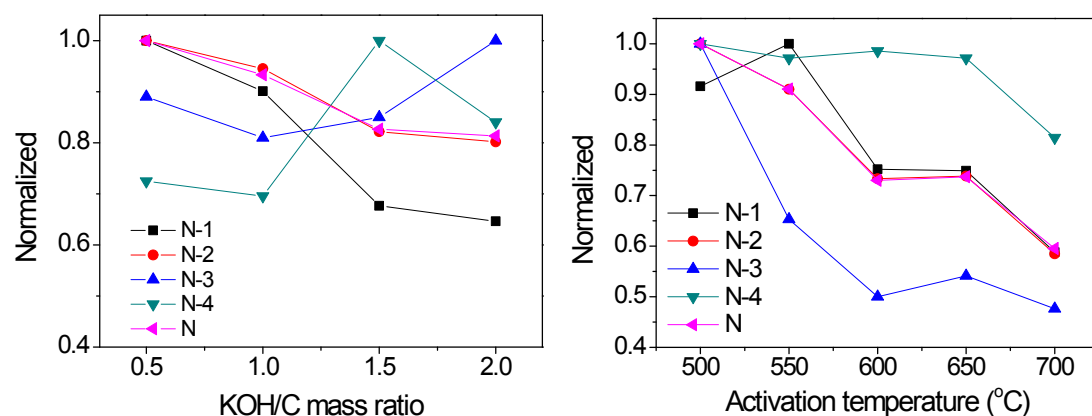

**Fig. S3** Variation of nitrogen species on the activated carbons prepared at different KOH/C ratios and activation temperatures
